# Supplementary material for: Randomized Double-Blind Clinical Trial Comparing Safety and Efficacy of the Biosimilar BCD-021 with Reference Bevacizumab
Source: Research Square preprint supplement (doi:10.21203/rs.3.rs-763106/v1), 2021-08-25
Supplement: Supplementary file 1 [file a22a7ec846f415e6a91fea68.docx]

**Supplemental Table 1:** List of IECs or IRBs

**Study Site # 01**

Ethics Committee of Arkhangelsk Regional Clinical Cancer Dispensary, 145/1. Prospect Obvodniy Kanal, Arkhangelsk.

Chairperson: Alexandra Yuryevna Pankratyeva.

**Study Site # 03**

Ethics Committee of State Healthcare Institution Tula Regional Cancer Dispensary, 16, Ul. Yablochkova, Tula, 300053.

Chairperson: Svetlana Mikhailovna Kireeva.

**Study Site # 05**

Ethics Committee of State Budgetary Healthcare Institution Samara Regional Clinical Cancer Dispensary,

50, Ul. Solnechnaya, Samaram, 443031.

Chairperson: Tatyana Gennadyevna Zolotareva.

**Study Site # 10**

Ethics Committee of Federal State Budgetary Military Educational Institution of Higher Professional Education S.M. Kirov Military Medical Academy of the Ministry of Defense of the Russian Federation,

6, Ul. Akademika Lebedeva, Saint Petersburg, 194044.

Chairperson: Sergey Borisovich Shustov.

**Study Site # 11**

Local Ethics Committee of Federal State Budgetary Institution N.N. Petrov Research Institute of Oncology of the Ministry of Healthcare of the Russian Federation,

68, Ul. Leningradskaya, Pesochniy, Saint Petersburg, 197758.

Chairperson: Evgeniy Vladimirovich Demin.

**Study Site # 13**

Ethics Committee of Moscow State Healthcare Institution Moscow City Oncology Hospital No. 62 of Healthcare Department of the City of Moscow,

27, Bldg. 1-26, P.O. Stepanovskoye, Krasnogorsk District, Moscow Region, 143423.

Chairperson: Svetlana Samoylovna Yudina.

**Study Site # 14**

Ethics Committee of State Budgetary Healthcare Institution Volgograd Regional Clinical Cancer Dispensary #1,78, Ul. Zemlyachki, Volgograd, 400138.

Chairperson: Sergey Alexeevich Zhuravlev.

**Study Site # 16**

Ethics Committee of Federal State Budgetary Institution N.N. Blokhin Russian Cancer Research Center of the Russian Academy of Medical Sciences,

24, Kashirskoe shosse, Moscow, 115478.

Chairperson: Dina Zurabovna Kupchyan.

**Study Site # 18**

Ethics Committee of State Budgetary Healthcare Institution Chelyabinsk Regional Clinical Cancer Dispensary,

42, Ul. Blykhera, Chelyabinsk, 454087.

Chairperson: Alexey Valeryevich Privalov.

**Study Site # 21**

Ethics Committee of State Budgetary Healthcare Institution Perm Regional Cancer Dispensary, 15, Ul. Baumana, Perm, 614066.

Chairperson: Yyuriiy Vladimirovich Kazakov.

**Study Site # 22**

Local Independent Ethics Committee of State Budgetary Healthcare Institution Chelyabinsk Regional Clinical Hospital.

70, Ul. Vorovskogo, Chelyabinsk, 454076.

Chairperson: Vladimir Nikolaevich Kuzmin.

**Study Site # 23**

Local Ethics Committee of Regional Budgetary Healthcare Institution Kursk Regional Clinical Cancer Dispensary,

20, Ul. Pirogova, Kursk, 305035.

Chairperson: Vladimir Vladimirovich Khvostovoy.

**Study Site # 24**

Local Ethics Committee of State Budgetary Healthcare Institution Volgograd Regional Cancer Dispensary #3,

25, Ul. Komsomolskaya, Volzhskiy, Volgograd Region, 404130.

Chairperson: Viktoriya Viktorovna Zhavoronkova.

**Study Site # 26**

Local Ethics Committee of State Budgetary Healthcare Institution of Stavropol Region Pyatigorsk Cancer Dispensary, 31, Prospect Kalinina, Pyatigorsk, Stavropol Region, 357502.

Chairperson: Liana Vasilyevna Zagorodnykh.

**Study Site # 27**

Ethics Committee Budgetary Healthcare Institution of Omsk Region Clinical Cancer Dispensary, 9/1. Ul. Zavertyaeva, Omsk, 644013.

Chairperson: Oleg Vladimirovich Leonov.

**Study Site # 29**

Local Ethics Committee of State Budgetary Healthcare Institution Kursk Regional Cancer Dispensary of Healthcare Department of Kursk Region,

20, Ul. Pirogova, Kursk, 305035.

Chairperson: Vladimir Vladimirovich Khvostovoy.

**Study Site # 30**

Ethics Committee of State Autonomous Healthcare Institution Republican Clinical Cancer Dispensary of the Ministry of Healthcare of the Republic of Tatarstan,

29, Ul. Sibirskiy Tract, Kazan, Republic of Tatarstan, 420029.

Chairperson: Luiza Gaynutdinovna Karpenko.

**Study Site # 34**

Local Ethics Committee of Federal State Budgetary Educational Institution of Higher Professional Education N.P. Ogarev Mordovian State University,

26 a, Ul. Ulyanova, Saransk, Republic of Mordovia, 430032.

Chairperson: Natalya Viktorovna Shmyreva.

**Study Site # 35**

Local Ethics Committee of State Budgetary Healthcare Institution Orenburg Regional Clinical Cancer Dispensary,

11, Prospect Gagarina, Orenburg, 460021.

Chairperson: Alexander Gennadyevich Shekhtman.

**Study Site # 36**

Ethics Committee of State Budgetary Healthcare Institution of Higher Professional Education

I.P. Pavlov First Saint Petersburg State Medical University of the Ministry of Healthcare of the Russian Federation,

10, Ul. Roentgena, Saint Petersburg, 197101.

Chairperson: Edvin Eduardovich Zvartau.

**Study Site # 43**

Ethics Committee Shree Hospital

Shree Hospital, 5th floor Siddharth Mansion,

Nagar Road, Pune-411014, Maharashtra

Chairperson: Dr. Bhagwat Gunale

**Study Site # 44**

Ethics Committee

Bharath Hospital and Institute of Oncology

# 438, Outer ring road, Hebbal

Mysuru- 570017, Karnataka

Chairperson: Dr. Majunath C

**Study Site # 50**

Ethics Committee of Healthcare Institution Brest Regional Clinical Cancer Dispensary,

6, Ul. Meditsinskaya, Brest, Republic of Belarus, 224027.

Chairperson: Vitaliy Nikolaevich Lemetskiy.

**Study Site # 53**

Yashoda Academy of Medical Education & Research

8th floor, Yashoda Hospitals, behind harihara kalabhavan,

S P Road, Secunderabad-500003. Andhra Pradesh

Chairperson: Justice Sri. V. Bhaskar Rao

**Study Site # 55**

Marudhar Hospital Ethics Committee,

A-93-99, Basement, Singh bhoomi, Khatipura, Jaipur-302012,

Rajasthan

Chairperson: Ret. Col S. S. Rathore.

**Study Site # 56**

Institutional Ethics Committee Poona Medical Research Foundation

E4-C to E4-F, 4th Floor, Fifth Avenue Condominium,

Dhole Patil Road, Pune-411001, Maharashtra

Chairperson: Lt. Gen (Dr) S A Cruze

**Study Site # 57**

Institutional Ethics Committee-Govt. Medical College, Aurangabad

Panchakki Road, Aurangabad-431001, Maharashtra.

Chairperson: Dr S H Talib

**Study Site # 58**

Institutional Ethics Committee,

All India Institute of Medical Sciences Bhubaneshwar,

Sijua, Patrapada,

Bhubaneshwar, Orissa,7510 19

Chairperson: Dr. Suresh Chandra Dash

**Study Site # 60**

Shatabadi Hospital Ethics Committee

C/o Shatabdi Superspeciality Hospital, G21,

Suyoji City Centre, Opp. Mahamarg Bus Stand,

Mumbai Naka, Nasik – 422002, Maharashtra

Chairperson: Dr. Neelima Shafekar

**Study Site # 62**

Ethics Committee of Vinnytsa Regional Clinical Cancer Dispensary, 84, Ul. Khmelnitskoye sjosse, Vinnytsa, Ukraine.

Chairperson: A.P. Kovalchuk

**Study Site # 63**

Ethics Committee of Zakarpattia Regional Clinical Cancer Dispensary, 2, Ul. Brodlokovicha, Uzhgorod, Ukraine.

Chairperson: O.S. Chemet

**Study Site # 65**

Ethics Committee of Municipal Treatment and Preventive Facility City Cancer Dispensary, 107B, Ul. Kalinina, Donetsk, Ukraine.

Chairperson: S.E. Bilousov

**Study Site # 67**

Institutional Ethics Committee,

Rajalakshmi Hospital

No. 21/1. Lakshmipura main road

Vidyaranyapura post

Bangalore, 560097, Karnataka

Chairperson: Ms. Chnadana T J

**Study Site # 68**

Ethics Committee of Municipal Healthcare Institution Makeevka City Hospital No. 2 12, Ul. Ferganskaya, Makeevka, Donetsk Region, Ukraine.

Chairperson: R.S. Titorenko

**Study Site # 69**

Ethics Committee of Municipal Institution Krivoy Rog Cancer Dispensary of Dnepropetrovsk Regional Council,

41, Dnepropetrovskoye shosse, Krivoy Rog, Ukraine.

Chairperson: O.V. Medvedkov

**Study Site # 70**

Ethics Committee of Municipal Healthcare Institution Kharkov Regional Clinical Cancer Center, 4, Ul. Lesoparkovaya, Kharkov, Ukraine.

Chairperson: D.V. Shapovalov.

**Study Site # 71**

Institutional Ethics Committee,

King George Medical University,

Lucknow-226003. UP

**Study Site # 72**

Institutional Ethics Committee of SMS Medical College & attached Hospitals.

Office of the Ethics Committee, Allergy clinic,

SMS Hospital, JLN Marg,

Jaipur-302004, Rajasthan

Chairperson: Dr. Shashi Singhvi

**Study Site # 74**

Institutional Ethics Committee S P Medical College & AG of Hospital, Bikaner.

Institutional Ethics Committee S P Medical College & AG of Hospital,

HRM cardiovascular Science & Research, Bikaner-334001, Rajasthan

Chairperson: Dr. G C Jain

**Study Site # 76**

HCG, Central Ethics Committee,

HCG Tower, P. Kalinga Rao Road,

Sampangirama Nagar Bangalore 560027, Karnataka

Chairperson: Dr. S G A Rao

**Study Site # 77**

Institutional Ethics Committee

Sri Ramachandra Medical College and Research Institute

No: 1, Ramachandra Nagar Porur, Chennai. 600116, Tamil Nadu

Chairperson: Dr. Nalini Ramamurthy

**Study Site # 78**

MAHE Ethics Committee

Mezzanine floor, KMC Old Library Building,

Madhava Nagar, Manipal-576104,

Udupi Dist., Karnataka

Chairperson: Dr. P.S Prakash

**Study Site # 79**

Institutional Ethics Committee

Meenakshi Mission Hospital and Research Centre

Lake Area, Melur Road, Madurai-625107, Tamil Nadu

Chairperson: Dr. Kumaresan

**Study Site # 80**

Institutional Ethics Committee

HCG Curie City Cancer Center,

# 44-1-1/3, Padavalarevu, Gunadala

Vijayawada- 520004 Andhra Pradesh

Chairperson: Dr. V. N. N. Arun Kumar

**Study Site # 81**

Institutional Ethics Committee,

Sapthagiri Institute of Medical Sciences and Research Center

#15 Chikkasandra, Hesaraghatta Main road,

Bangalore, Karnataka 560090

Chairperson: Dr. Prasanna Kumar

**Study Site # 83**

Institutional Ethics Committee, KLE University

KLE University KLE Dr.PK Hospital and MRC

Nehru Nagar Belagavi

Karnataka - 590010

Chairperson: Dr. Subarna Roy

**Study Site # 85**

Institutional Ethics Committee

Noble Hospital, Room No. 701

No:4 Audiappa street, Alagappa road, Purasaiwakkam,

Chennai- 600084, Tamil Nadu

Chairperson: Dr. A. Vinoth Kumar

**Study Site # 88**

Institutional Ethics Committee,

RG Kar Medical College & Hospital,

1, Kshudiram Bose Sarani, Kolkata – 700004, West Bengal

Chairperson: Dr. Krishnageshu Ray

**Study Site # 89**

IPGME & R Research Oversight Committee,

Office of the dean,

Institute of Post graduate Medical Education and Research,

244 AJC Bose Road, Kolkata – 700020. West Bengal

Chairperson: Dr Avijit Hazara.

**Study Site # 90**

Ethics Committee N.S.C.B.C Research Institute

Netaji Subhash Chandra Bose Cancer Hospital,

3081, Nayabad, Kolkata-700094, West Bengal.

Chairperson: Dr. M L. Chakraborty

**Study Site # 91**

Institutional Ethics Committee,

NRS Medical College & Hospital,

138, AJC Bose Road, Kolkata – 700014, West Bengal

Chairperson: Prof (Dr). R. N Chattopadhyay

**Study Site # 94**

Institutional Ethics Committee of B. J. Govt. Medical

College & Sassoon General Hospital, Pune-411001, Maharashtra

Chairperson: Dr. Dayanand D. Shetty,

**Study Site # 95**

Ethics Committee Shalby Limited,

Shalby Hospitals, Opp. Karnavati Club, S. G. Highway,

Ahmedabad – 380015. Gujarat

Chairperson: Dr. Guruprasad Dumra

**Study Site # 96**

Amravati Ethics Committee

52/B, Shankar Nagar main road,

Amravathi-444606, Maharashtra

Chairperson: Dr. S.S. Pande

**Study Site # 97**

Manavata Clinical Research Institute Ethics Committee

Curie Manavata cancer centre,

Opp. Mahamarg busstand,Mumbai naka, Nashik-422004, Maharashtra

Chairperson: Prof. Shantanu Kale

**Study Site # 98**

Institutional Ethics Committee- Clinical Studies,

Site office Building,

Apollo Hospitals International Ltd, Bhat,

Gandhingar, Gujarat – 382428.

Chairperson: Dr. Mira Desai
